# Supplementary material for: Borneol Depresses P-Glycoprotein Function by a NF-κB Signaling Mediated Mechanism in a Blood Brain Barrier in Vitro Model
Source: MDPI journal article supplement (doi:10.3390/ijms161126051), 2015-11-18
Supplement: s1 [file s1]

# Supplementary Materials: Borneol Depresses P-Glycoprotein Function by a NF- $\kappa$ B Signaling Mediated Mechanism in a Blood Brain Barrier *in Vitro* Model

Xiang Fan, Lijuan Chai, Han Zhang, Yuefei Wang, Boli Zhang and Xiumei Gao

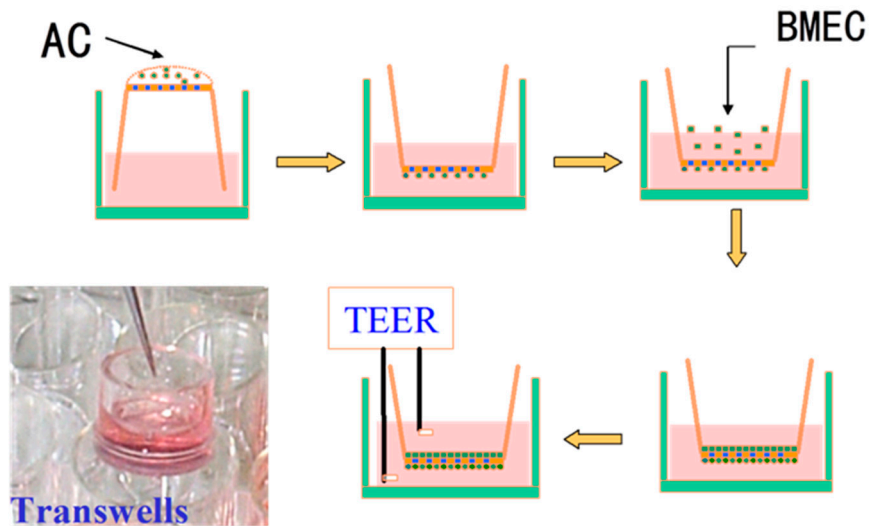

**Figure S1.** The flow chart of *in vitro* blood brain barrier model establishment. BMEC, brain microvascular endothelial cells; AC, astrocytes; TEER, transendothelial electrical resistance.
